# Supplementary material for: The Demirjian versus the Willems method for dental age estimation in different populations: A meta-analysis of published studies
Source: PubMed Central journal article supplement (PMC5678786; doi:10.1371/journal.pone.0186682), 2017-11-08
Supplement: pone.0186682.s003.pdf [file pone.0186682.s003.pdf]

|                              |                             |    |
|------------------------------|-----------------------------|----|
| Amberkova et al. 2014        | Cross-sectional comparative | 27 |
| Asab et al. 2011             | Cross-sectional             | 27 |
| Bagherpour et al. 2010       | Cross-sectional             | 28 |
| Caneiro et al. 2015          | Retrospective               | 27 |
| Cavric et al. 2016           | Retrospective               | 28 |
| Djukic et al, 2013           | Retrospective               | 27 |
| El Bakary et al. 2010        | Cross-sectional             | 29 |
| Erdem et al. 2013            | Retrospective               | 26 |
| Feijoo et al. 2012           | Retrospective               | 26 |
| Flood et al. 2013            | Retrospective               | 28 |
| Galic et al. 2011            | Cross-sectional comparative | 26 |
| Hegde et al. 2016            | Observational               | 26 |
| Ifesanya et al. 2012         | Retrospective               | 26 |
| Javadinejad et al. 2013      | Retrospective               | 26 |
| Khoja, Fida and Shaikh 2015  | Retrospective               | 27 |
| Kirzioglu and Ceyhan 2012    | Retrospective               | 26 |
| Koshy and Tandon 1998        | Cross-sectional             | 27 |
| Kumaresan et al. 2016        | Cross-sectional             | 25 |
| Leurs et al. 2005            | Retrospective               | 25 |
| Mani et al. 2008             | Cross-sectional             | 28 |
| Mohammed et al. 2014         | Cross-sectional comparative | 26 |
| Mohammed et al. 2015         | Cross-sectional comparative | 25 |
| Nik-Hussein and Kee Gan 2011 | Cross-sectional             | 26 |
| Patel et al. 2016            | Cross-sectional comparative | 25 |
| Urzel and Bruzek 2015        | Retrospective               | 26 |
| Uys et al. 2014              | Retrospective               | 26 |
| Ye et al. 2014               | Retrospective               | 27 |
| Zhai et al. 2016             | Retrospective               | 27 |
